# Supplementary material for: Enhanced photoelectrochemical water splitting using nanostructured films: p-CuO sensitized with polyhedral n-Cu2O particles and CuS as photocathode
Source: Royal Society of Chemistry journal article supplement (doi:10.1039/d4ma00343h), 2024-01-01
Supplement: d4ma00343h1.pdf [file d4ma00343h1.pdf]

## **Supporting Information**

### Enhanced Photoelectrochemical Water Splitting using Nanostructured Films: p-CuO Sensitized with Polyhedral n-Cu<sub>2</sub>O Particles and CuS as Photocathode

*Hugo L. S. Santos<sup>1</sup> and Lucia H. Mascaro<sup>1\*</sup>.*

<sup>1</sup> Center for Innovation on New Energy (CINE), Department of Chemistry, Federal University of São Carlos, Road Washington Luiz, km 235, São Carlos, SP 13565-905, Brazil.

\*[lmascaro@ufscar.br](mailto:lmascaro@ufscar.br)

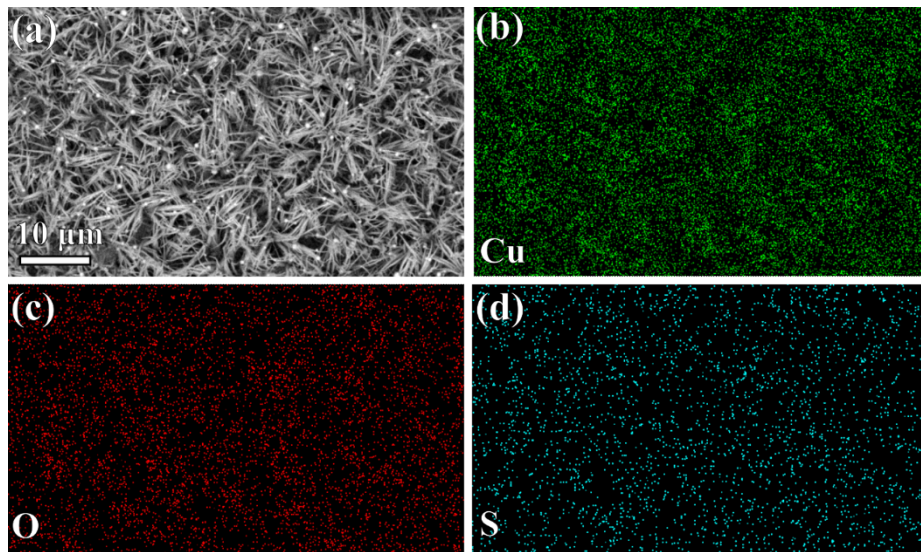

**Figure S1.** (a) SEM surface image and elemental EDX mappings of (b) Cu, (c) O and (d) S for the CuO/Cu<sub>2</sub>O/CuS film.

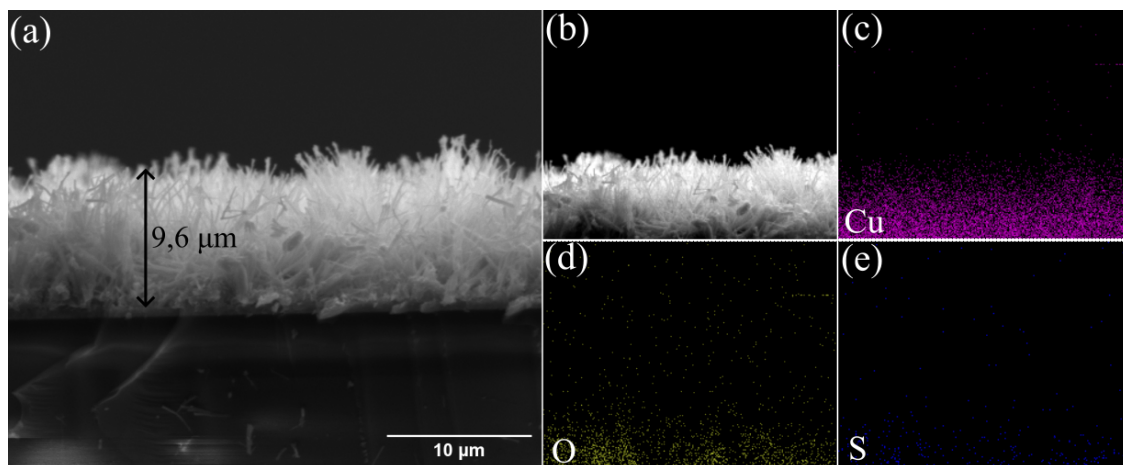

**Figure S2.** (a) SEM cross-section image and (b)-(e) Elemental mapping by EDX of CuO/Cu<sub>2</sub>O/CuS film.

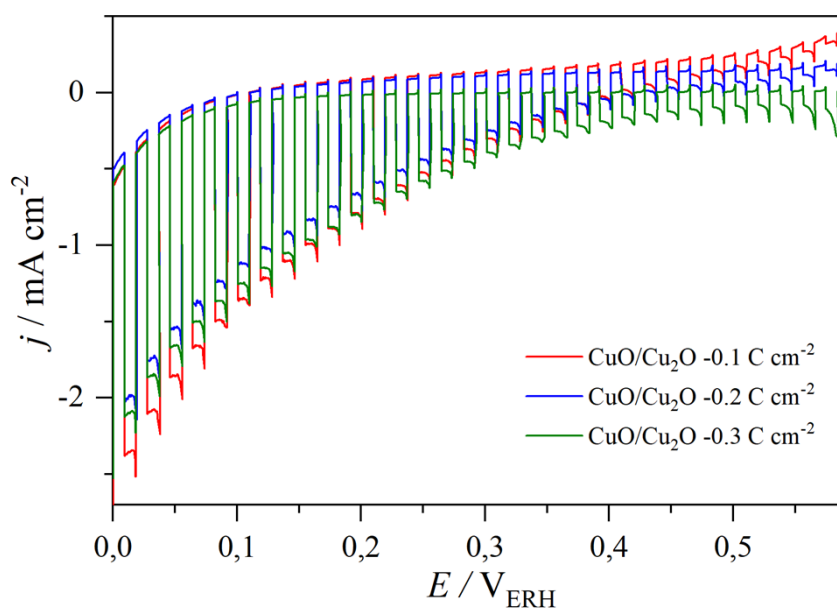

**Figure S3** – Linear voltammograms at  $10 \text{ mV s}^{-1}$  under AM 1.5G pulsed illumination ( $100 \text{ mW cm}^{-2}$ ) for the  $\text{CuO/Cu}_2\text{O}$  films obtained at different deposition charge densities of  $\text{Cu}_2\text{O}$ . Measurements carry out in  $0.5 \text{ mol L}^{-1} \text{ Na}_2\text{SO}_4$  solution (pH 6).

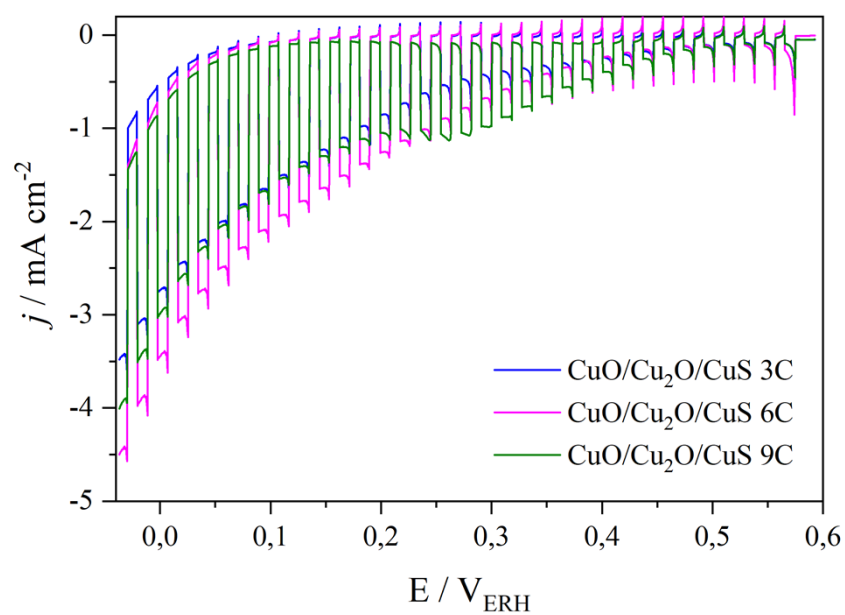

**Figure S4** – Linear voltammograms at  $10 \text{ mV s}^{-1}$  under AM 1.5G pulsed illumination ( $100 \text{ mW cm}^{-2}$ ) for CuO/Cu<sub>2</sub>O/CuS films obtained with different numbers of SILAR cycles. Measurements carry out in  $0.5 \text{ mol L}^{-1} \text{ Na}_2\text{SO}_4$  solution (pH 6).

**Table S1.** Parameters obtained from the adjustment of the EIS data for the CuO, CuO/Cu<sub>2</sub>O and CuO, CuO/Cu<sub>2</sub>O/CuS films , using the equivalent circuit with one time constant in series (1TS) inserted in Figure 7.

| Sample                    | $R_s$<br>( $\Omega \text{ cm}^2$ ) | $R_{ct}$<br>( $\Omega \text{ cm}^2$ ) | CPE                   |            | Chi <sup>2</sup>      |
|---------------------------|------------------------------------|---------------------------------------|-----------------------|------------|-----------------------|
|                           |                                    |                                       | CPE<br>(T)            | CPE<br>(P) |                       |
| CuO                       | 2.30                               | <b>248.15</b>                         | $1.49 \times 10^{-4}$ | 0.69       | $9.22 \times 10^{-5}$ |
| CuO/Cu <sub>2</sub> O     | 3.38                               | <b>187.80</b>                         | $1.11 \times 10^{-4}$ | 0.74       | $5.29 \times 10^{-4}$ |
| CuO/Cu <sub>2</sub> O/CuS | 2.95                               | <b>132.47</b>                         | $1.79 \times 10^{-4}$ | 0.74       | $1.28 \times 10^{-4}$ |

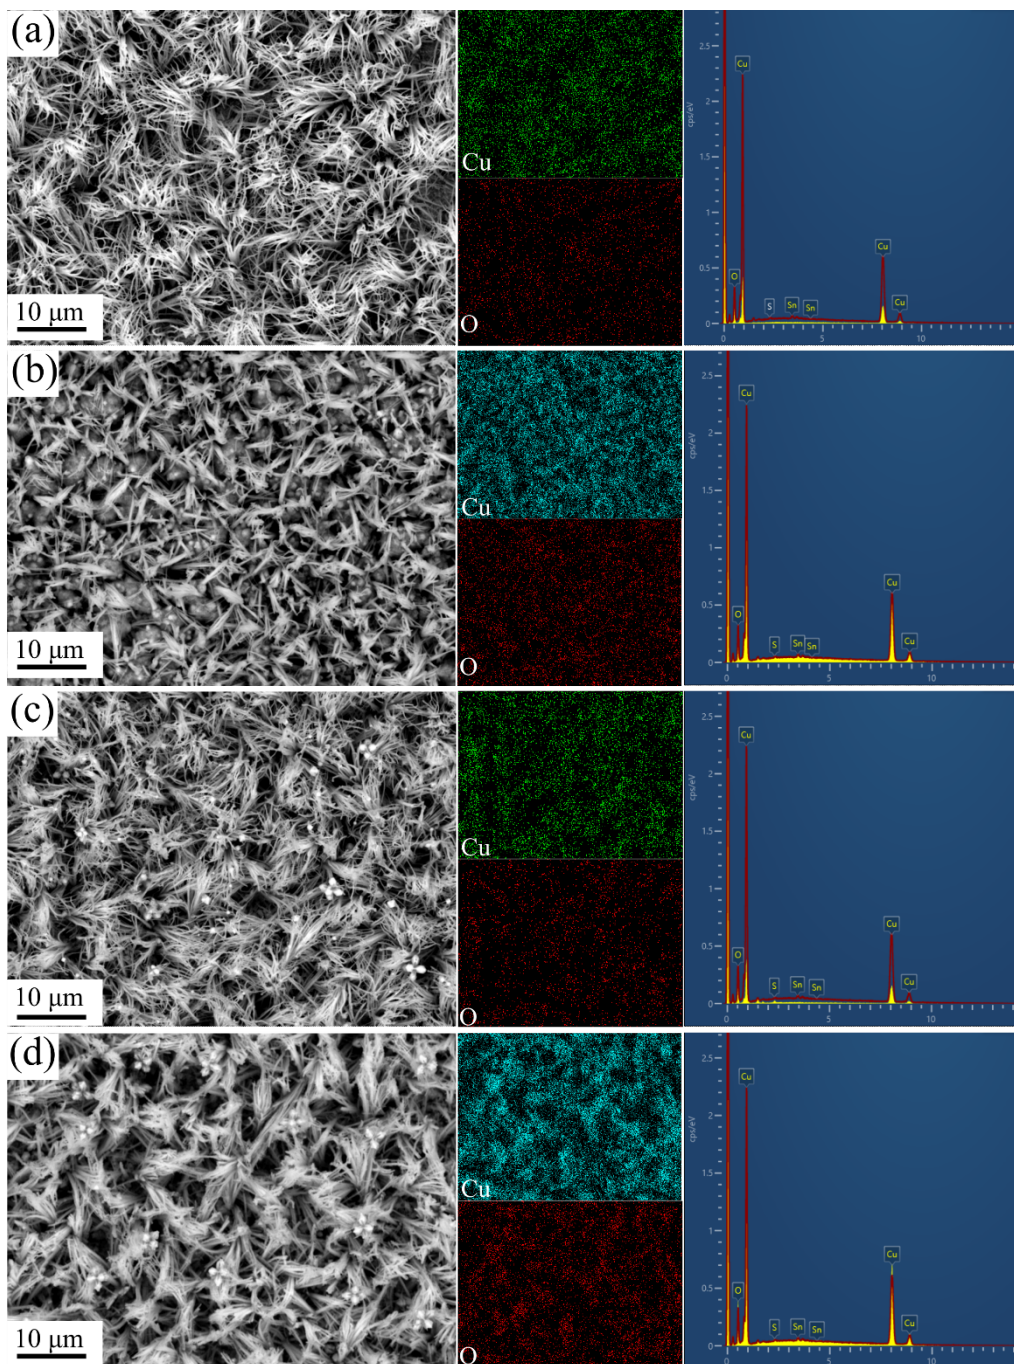

**Figure S5.** SEM surface images and EDX elemental mapping for bare CuO (a) before and (b) after the stability test. SEM surface images and EDX elemental mapping for CuO/Cu<sub>2</sub>O/CuS (c) before and (d) after the stability test.
